# Supplementary material for: Decorating Ag3PO4 nanodots on mesoporous silica-functionalized NaYF4:Yb,Tm@NaLuF4 for efficient sunlight-driven photocatalysis: synergy of broad spectrum absorption and pollutant adsorption-enrichment
Source: Royal Society of Chemistry journal article supplement (doi:10.1039/c9qi01003c), 2019-01-01
Supplement: c9qi01003c1.pdf [file c9qi01003c1.pdf]

## Supporting information

### **Decorating $\text{Ag}_3\text{PO}_4$ Nanodots on Mesoporous Silica-functionalized $\text{NaYF}_4:\text{Yb,Tm}@ \text{NaLuF}_4$ for Efficient Sunlight-driven Photocatalysis: Synergy of Broad Spectrum Absorption and Pollutant Adsorption-Enrichment**

Zongjun Liu<sup>a</sup>, Juanyuan Hao<sup>b\*</sup>, You Wang<sup>c\*</sup>, Quan Sun<sup>a</sup>, Di Zhang<sup>a</sup>, Yang Gan<sup>d\*</sup>

<sup>a</sup> School of Materials Science and Engineering, Harbin Institute of Technology, Harbin 150001, China.

<sup>b</sup> State Key laboratory of Urban Water Resource and Environment, Harbin Institute of Technology, Harbin 150001, China. E-mail: [jyhao@hit.edu.cn](mailto:jyhao@hit.edu.cn) (J. Hao)

<sup>c</sup> Key Laboratory of Micro-Systems and Micro-Structures Manufacturing, Ministry of Education, Harbin 150001, P. R. China. E-mail: [y-wang@hit.edu.cn](mailto:y-wang@hit.edu.cn) (Y. Wang)

<sup>d</sup> School of Chemistry and Chemical Engineering, Harbin Institute of Technology, Harbin 150001, China. E-mail: [ygan@hit.edu.cn](mailto:ygan@hit.edu.cn) (Y. Gan)

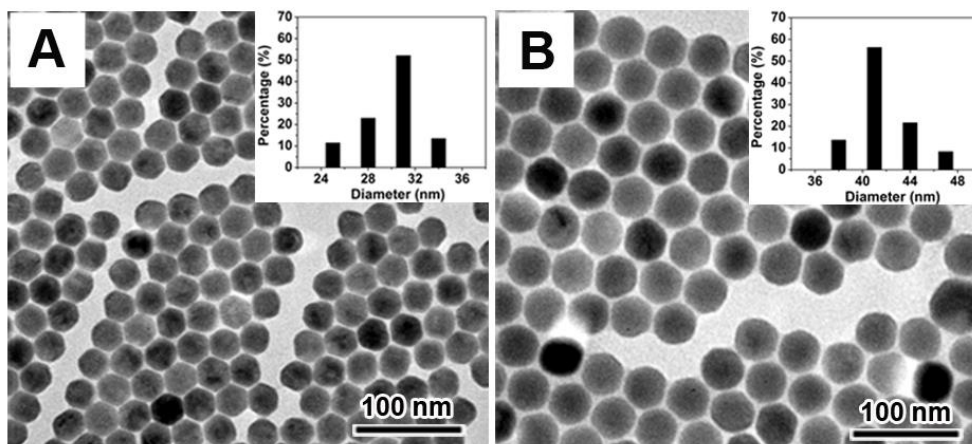

**Fig. S1.** TEM images of (A) NaYF<sub>4</sub>:Yb,Tm and (B) NaYF<sub>4</sub>:Yb,Tm@NaLuF<sub>4</sub>. Insets are the corresponding particle size distribution.

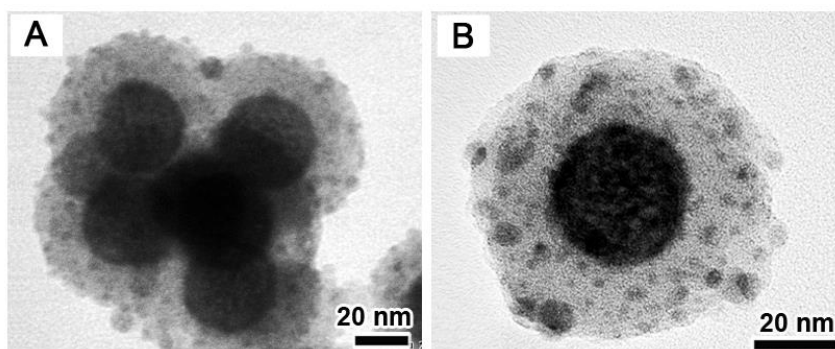

**Fig. S2.** (A) TEM image and (B) enlarged TEM image of UCNP@mSiO<sub>2</sub>-Ag<sub>3</sub>PO<sub>4</sub>.

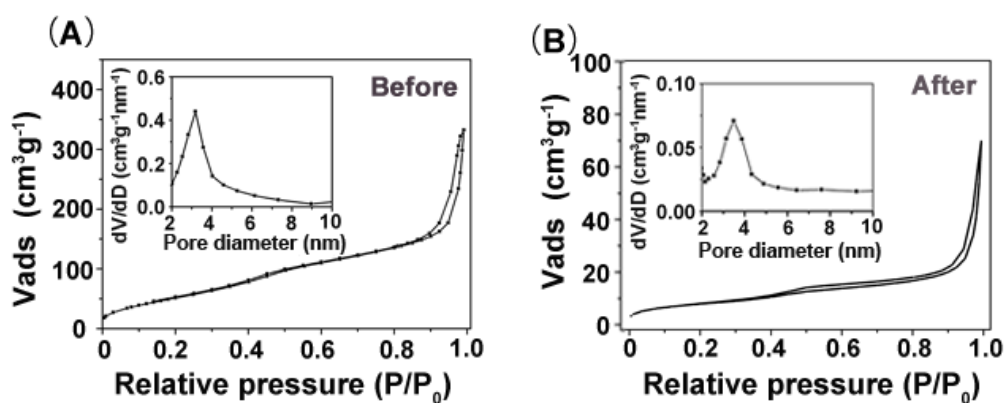

**Fig. S3.** N<sub>2</sub> adsorption/desorption isotherms and pore size distribution (inset) of as-synthesized UCNP@mSiO<sub>2</sub> before (A) and after (B) Ag<sub>3</sub>PO<sub>4</sub> deposition.

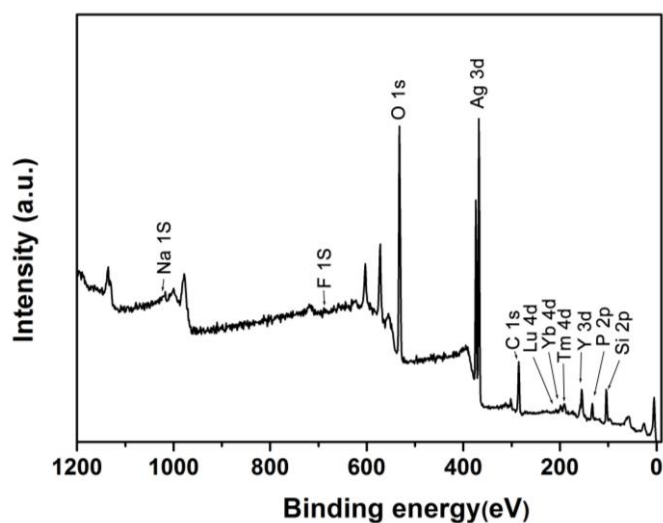

**Fig. S4.** The XPS spectra of the UCNP@mSiO<sub>2</sub>-Ag<sub>3</sub>PO<sub>4</sub> nanocomposite.

**Table S1.** The content of different elements in UCNP@mSiO<sub>2</sub>-Ag<sub>3</sub>PO<sub>4</sub> using XPS analysis.

| Element      | Si    | O     | P    | Ag   | Y    | Na   | F    | Tm   | Yb   | Lu   |
|--------------|-------|-------|------|------|------|------|------|------|------|------|
| Proportion % | 14.61 | 45.55 | 5.18 | 8.96 | 2.70 | 0.53 | 1.59 | 0.04 | 0.26 | 0.24 |

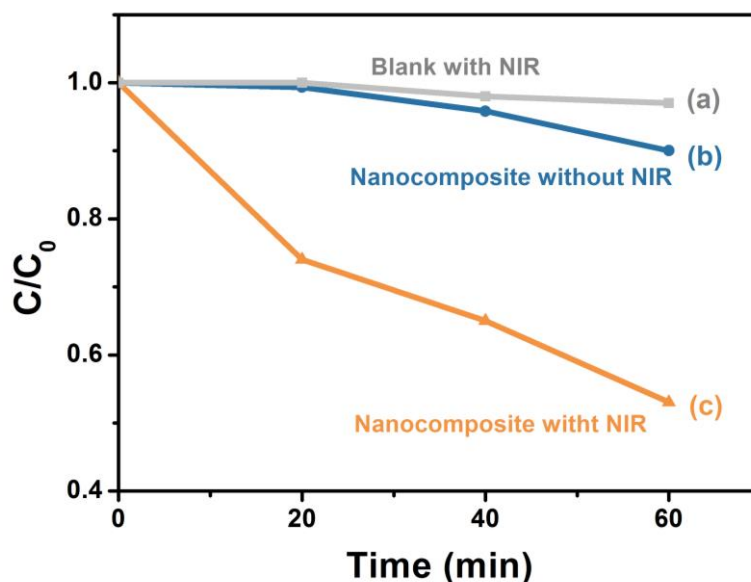

**Fig. S5.** The photocatalytic degradation rates of RhB in the presence of UCNP@mSiO<sub>2</sub>-Ag<sub>3</sub>PO<sub>4</sub> with (a) and without (b) 980 nm NIR, (c) is blank test with NIR irradiation.

**Table S2.** Comparison of NIR light-driven photocatalytic activity of UCNP@mSiO<sub>2</sub>-Ag<sub>3</sub>PO<sub>4</sub> composite with other UCNP-based photocatalysts. MB: methylene blue; RhB: rhodamine B; MO: methyl orange.

| Photocatalyst                                                               | Dye, Volume  | Light, Intensity             | Degrading Efficiency | References   |
|-----------------------------------------------------------------------------|--------------|------------------------------|----------------------|--------------|
| NaYF <sub>4</sub> :Yb,Tm/TiO <sub>2</sub>                                   | MB, 15 mg/L  | 980 nm, 10 W/cm <sup>2</sup> | 14 h: 65%            | (1)          |
| NaYF <sub>4</sub> :Yb,Tm/TiO <sub>2</sub>                                   | RhB, 10 mg/L | 980 nm, 1 W                  | 24 h: 75.7%          | (2)          |
| NaYF <sub>4</sub> :Yb,Tm/CdS                                                | RhB, 10 mg/L | 980 nm, 2 W                  | 3 h: 24%             | (3)          |
| NaYF <sub>4</sub> :Yb,Tm/ CNX                                               | RhB, 10 mg/L | 980 nm, 1 W                  | 6 h: 57.6%           | (4)          |
| CaF <sub>2</sub> :Er,Tm,Yb/ BiVO <sub>4</sub>                               | MO, 10 mg/L  | 980 nm, 2 W                  | 6 h: ~10%            | (5)          |
| NaYF <sub>4</sub> :Yb,Tm/CdS/TiO <sub>2</sub>                               | MB, 15 mg/L  | 980 nm, 2 W/cm <sup>2</sup>  | 20 h: ~70%           | (6)          |
| MoS <sub>2</sub> -NaYF <sub>4</sub> : Yb <sup>3+</sup> /Er <sup>3+</sup>    | RhB, 25 mg/L | 980 nm, -                    | 12 h: ~61%           | (7)          |
| NaYF <sub>4</sub> :Yb,Tm@mSiO <sub>2</sub> -Ag <sub>3</sub> PO <sub>4</sub> | RhB, 3 mg/L  | 980 nm, 3 W                  | 1 h: ~45%            | In this work |

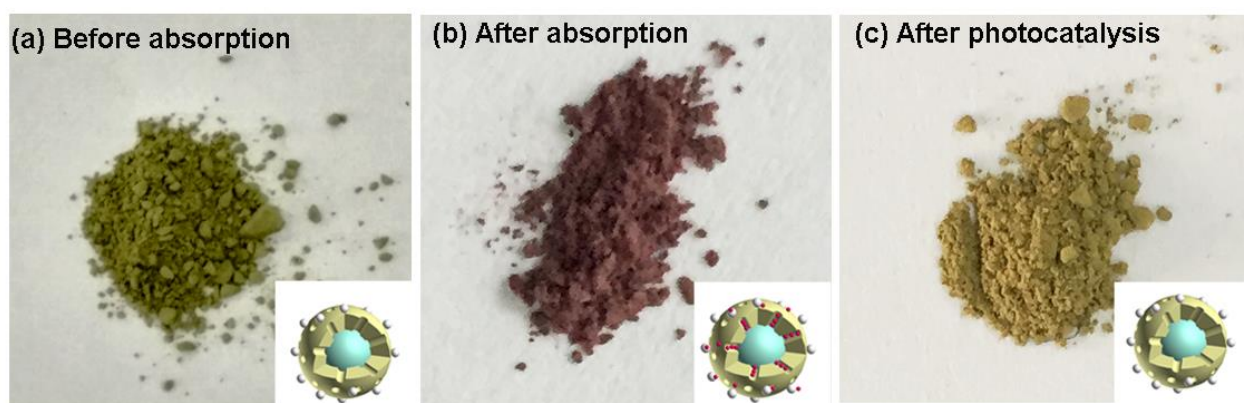

**Fig. S6** Photos showing the colour change of UCNP@mSiO<sub>2</sub>-Ag<sub>3</sub>PO<sub>4</sub> before (a) and after (b) RhB absorption and after photocatalysis (c). To observe the colour change more clearly, a high RhB concentration of 100 mg/L was used in this study.

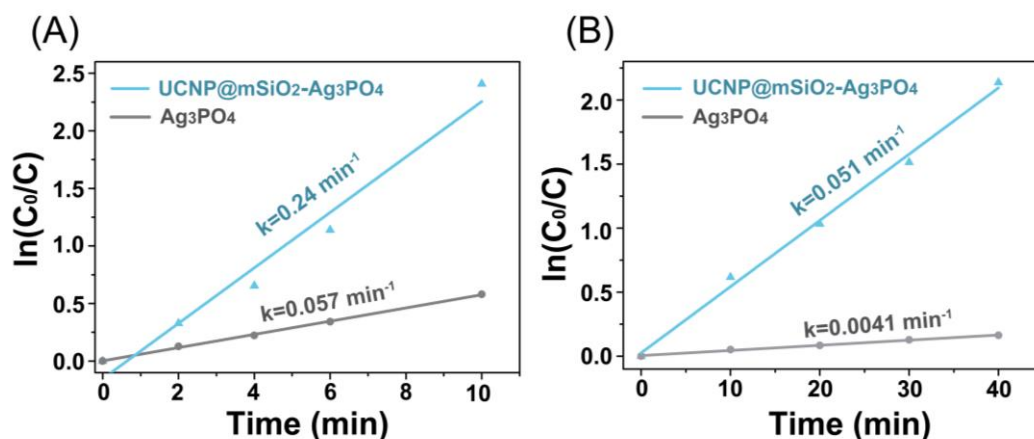

**Fig. S7.** Apparent rate constants of  $\text{Ag}_3\text{PO}_4$  and  $\text{UCNP@mSiO}_2\text{-Ag}_3\text{PO}_4$  on the degradation of RhB solution under natural sunlight irradiation under dynamic condition (A) and static condition (B). The reaction kinetics was fitted using a Langmuir-Hinshelwood kinetic model with a first-order rate equation.  $C$  is the concentration of pollutants at given irradiation time and  $C_0$  is the concentration after the absorption equilibrium.

## References

1. Y. Tang, W. Di, X. Zhai, R. Yang and W. Qin, *ACS Catalysis*, 2013, **3**, 405-412.
2. D.-X. Xu, Z.-W. Lian, M.-L. Fu, B. Yuan, J.-W. Shi and H.-J. Cui, *Applied Catalysis B: Environmental*, 2013, **142-143**, 377-386.
3. C. Li, F. Wang, J. Zhu and J. C. Yu, *Applied Catalysis B: Environmental*, 2010, **100**, 433-439.
4. X. Li, H. Ren, Z. Zou, J. Sun, J. Wang and Z. Liu, *Chemical communications*, 2016, **52**, 453-456.
5. S. Huang, N. Zhu, Z. Lou, L. Gu, C. Miao, H. Yuan and A. Shan, *Nanoscale*, 2014, **6**, 1362-1368.
6. X. Guo, W. Di, C. Chen, C. Liu, X. Wang and W. Qin, *Dalton transactions*, 2014, **43**, 1048-1054.
7. M. Chatti, V. N. Adusumalli, S. Ganguli and V. Mahalingam, *Dalton transactions*, 2016, **45**, 12384-12392.
